# Supplementary material
Source: HighWire-hosted journal article supplement (https://fg.bmj.com/content/13/5/423)

### How much speciality experience do you have?

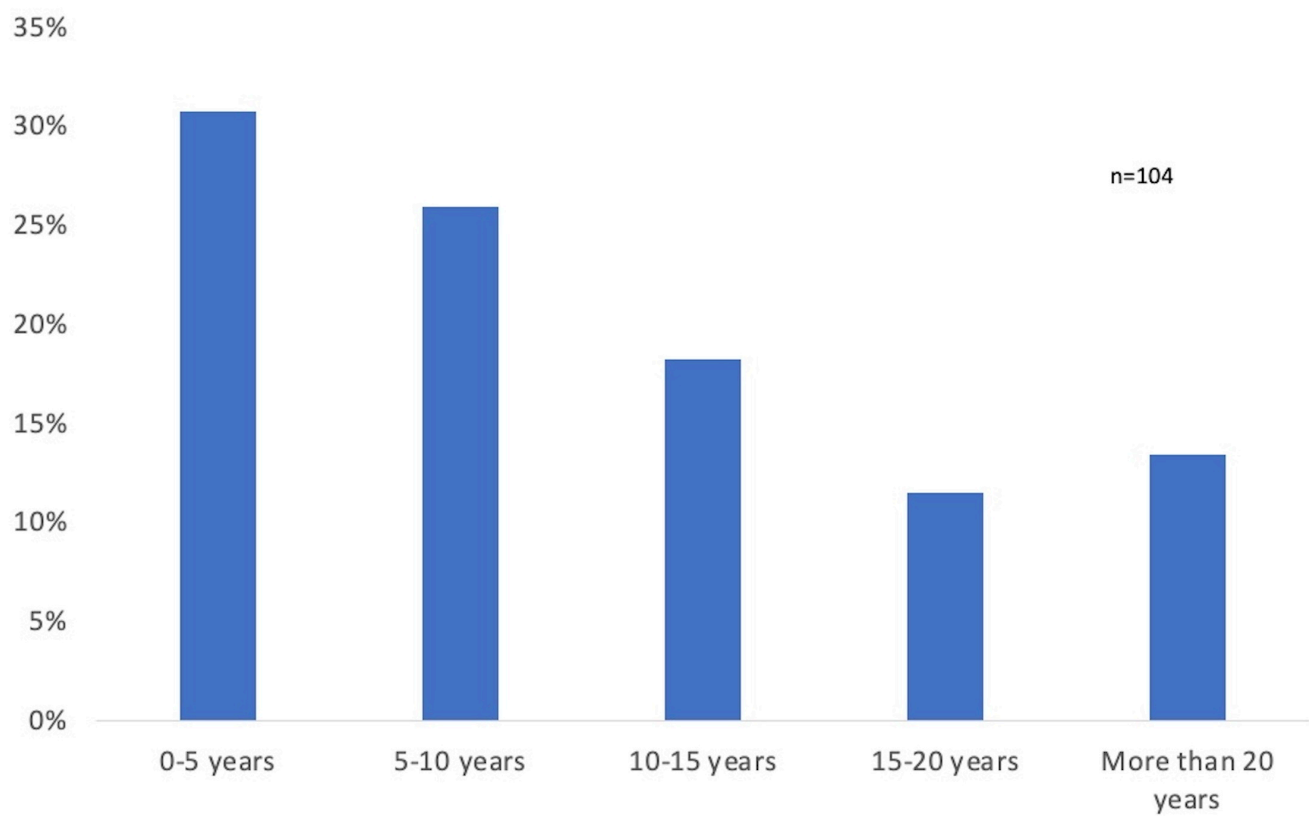

Supplement: inline-supplementary-material-2 [file inline-supplementary-material-2.pdf]
